# Supplementary material for: Functionalization of CdSe semiconductor nanocrystals with organic charge-transporting ligands
Source: Royal Society of Chemistry journal article supplement (doi:10.1039/c5tc00519a), 2015-01-01
Supplement: c5tc00519a1.pdf [file c5tc00519a1.pdf]

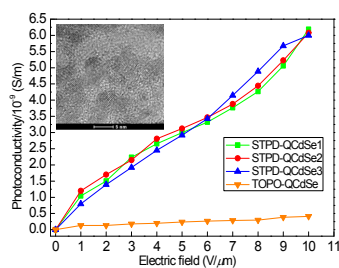

Sulfonation of TPD and subsequent passivation of CdSe nanocrystals for use as efficient photosensitizers in organic photoconductive matrices is reported.
